# Supplementary material for: Loss of SELENOW aggravates muscle loss with regulation of protein synthesis and the ubiquitin-proteasome system
Source: PubMed Central journal article supplement (PMC11414739; doi:10.1126/sciadv.adj4122), 2024-09-20
Supplement: sciadv.adj4122_sm.pdf [file sciadv.adj4122_sm.pdf]

Supplementary Materials for  
**Loss of SELENOW aggravates muscle loss with regulation of protein  
synthesis and the ubiquitin-proteasome system**

Jia-Cheng Yang *et al.*

Corresponding author: Lv-Hui Sun, lvhuisun@mail.hzau.edu.cn

*Sci. Adv.* **10**, eadj4122 (2024)  
DOI: 10.1126/sciadv.adj4122

**The PDF file includes:**

Supplementary Text  
Figs. S1 to S5  
Tables S1 to S3  
Legend for table S4

**Other Supplementary Material for this manuscript includes the following:**

Table S4

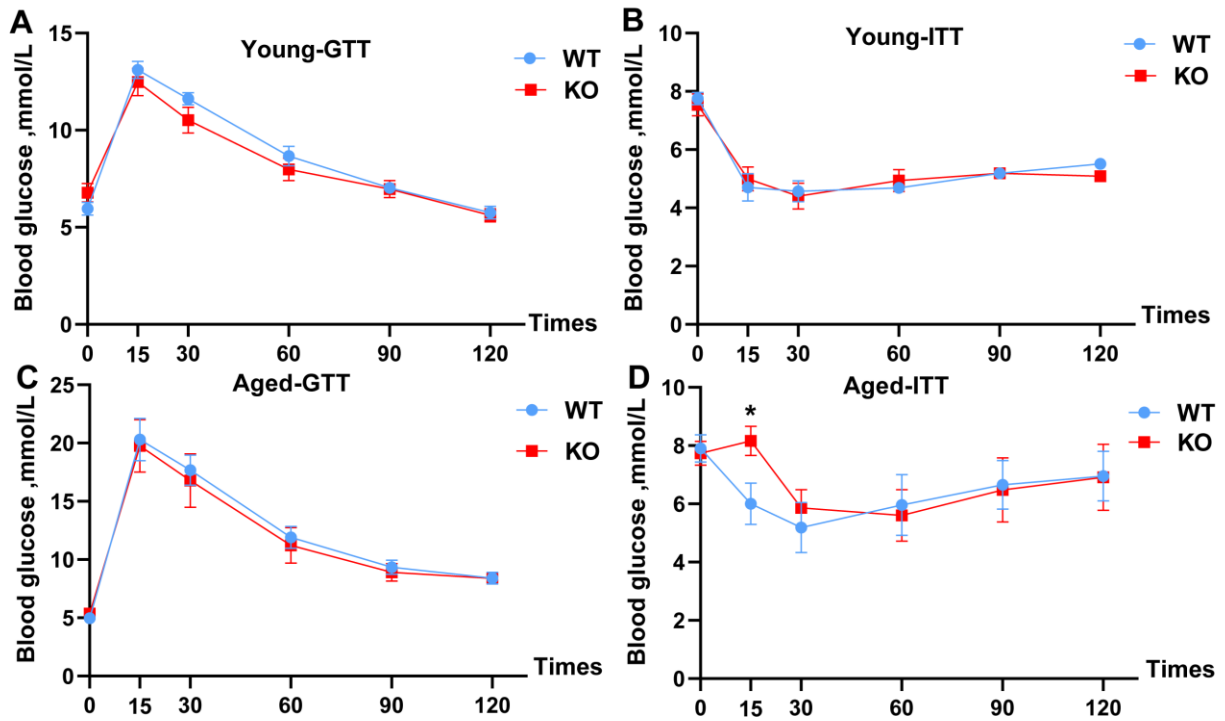

**Fig. S1 Glucose tolerance tests (GTT) and insulin tolerance tests (ITT) in wild type and KO young and aged mice.**

(A-B) GTT and ITT results of 2-month old mice, n=6-7

(C-D) GTT and ITT results of 24-month old mice, n=8

Intraperitoneal glucose tolerance and insulin tolerance test was performed, and plasma glucose levels were measured at 0, 15, 30, 60, and 120 min. Data are means  $\pm$  SEM; Student's t test, \* $P \leq 0.05$ .

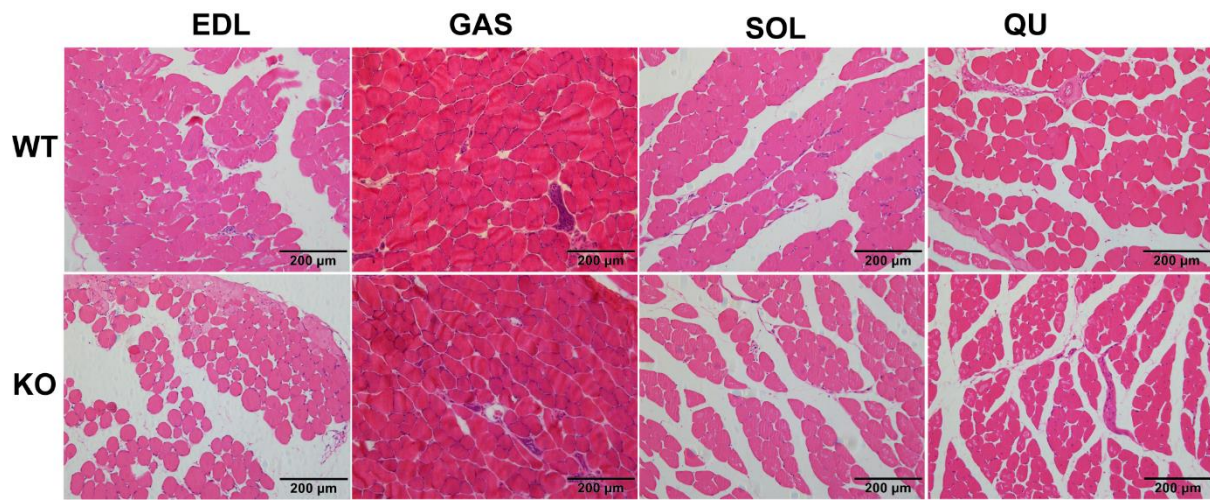

**Fig. S2 Effect of *SELENOW* KO on morphology of different muscle tissues in aged mice**  
Representative H&E staining of EDL, GAS, SOL, and QU muscle, n=3-4, scar bar=200 μm.

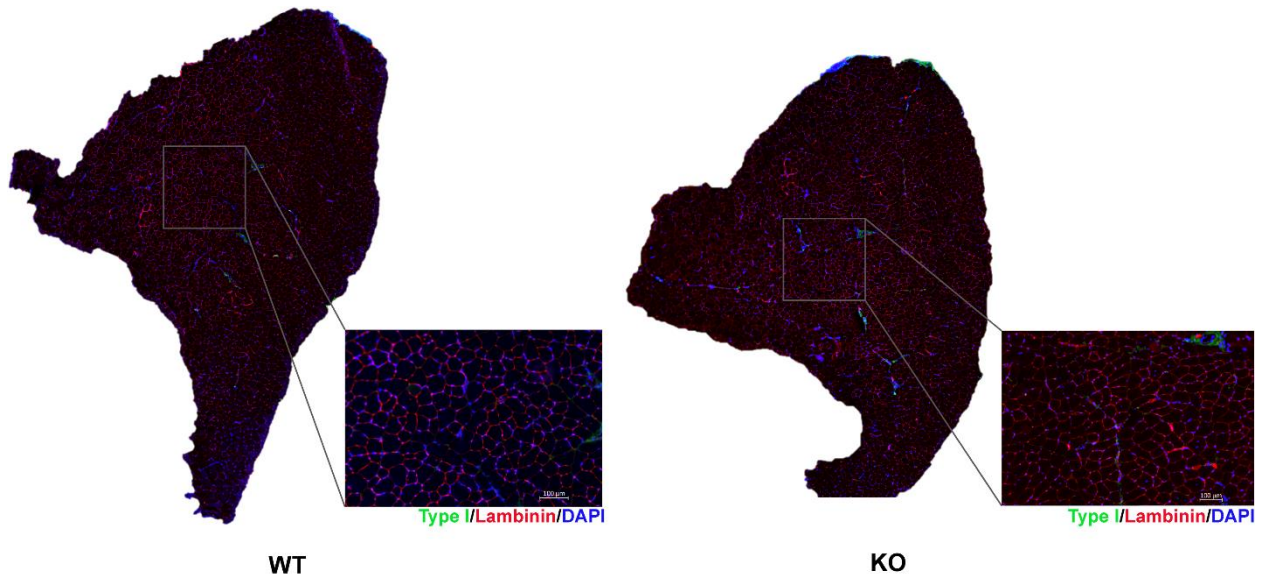

**Fig. S3 Effect of *SELENOW* KO on Type I fibers in aged mice.**

Representative Laminin staining of Type I fibers of TA muscle, n=5, scale bar=100 μm.

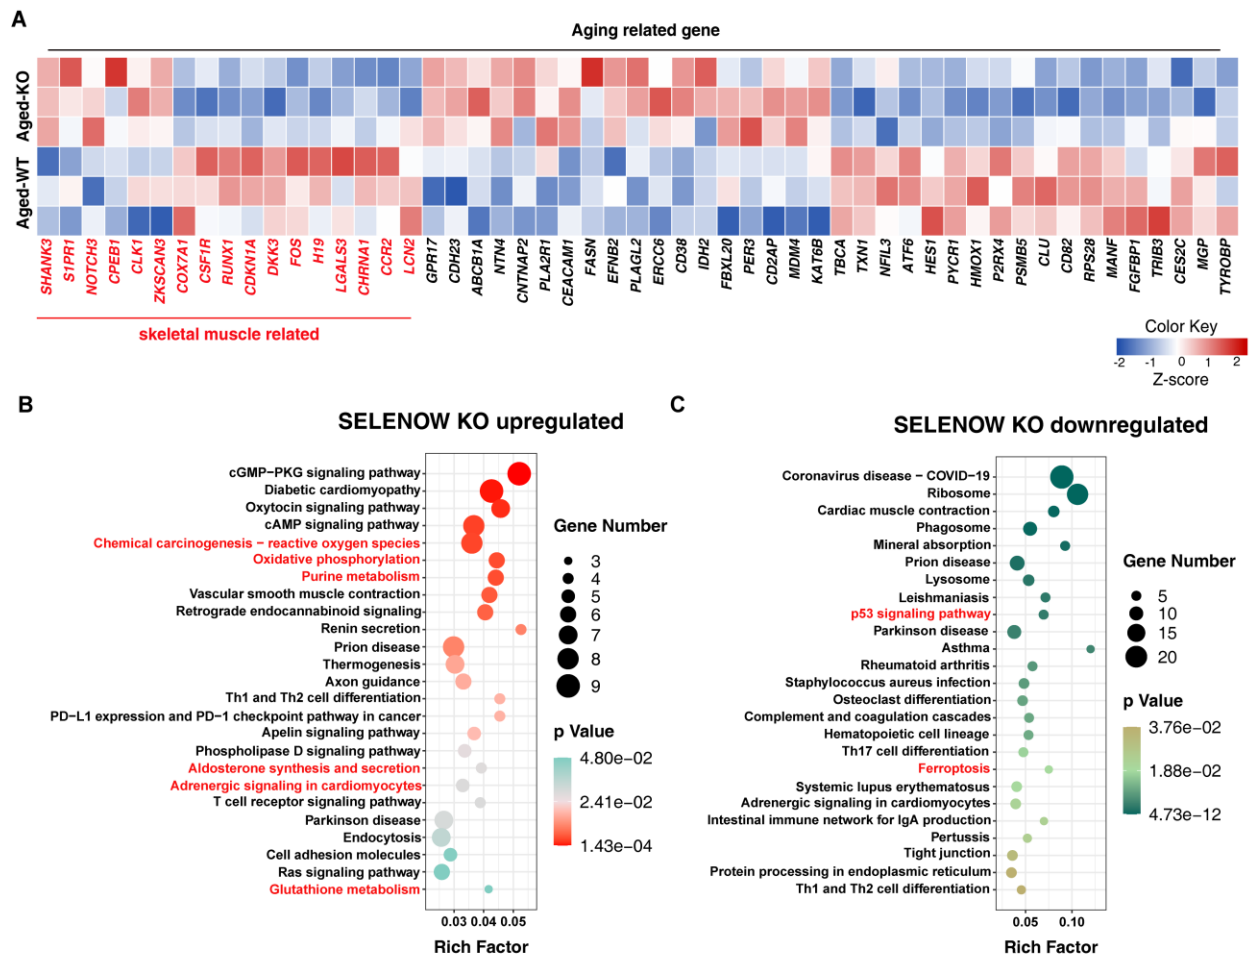

**Fig. S4. KEGG pathway enrichments and heat maps in aged mice between WT and KO.**  
 (A) Heat map diagram showing the downregulated and upregulated genes related to aging in TA muscle of SELENOW KO versus WT mice, genes marked in red font also relate to skeletal muscle homeostasis,  $n=3$ .  
 (B-C) KEGG analysis showing the enrichment of upregulated and downregulated pathways in TA muscle of SELENOW KO versus WT mice, the pathways marked in red font are associated with ROS metabolic process,  $n=3$ .

## Go Enrichment of the proteins with SELENOW

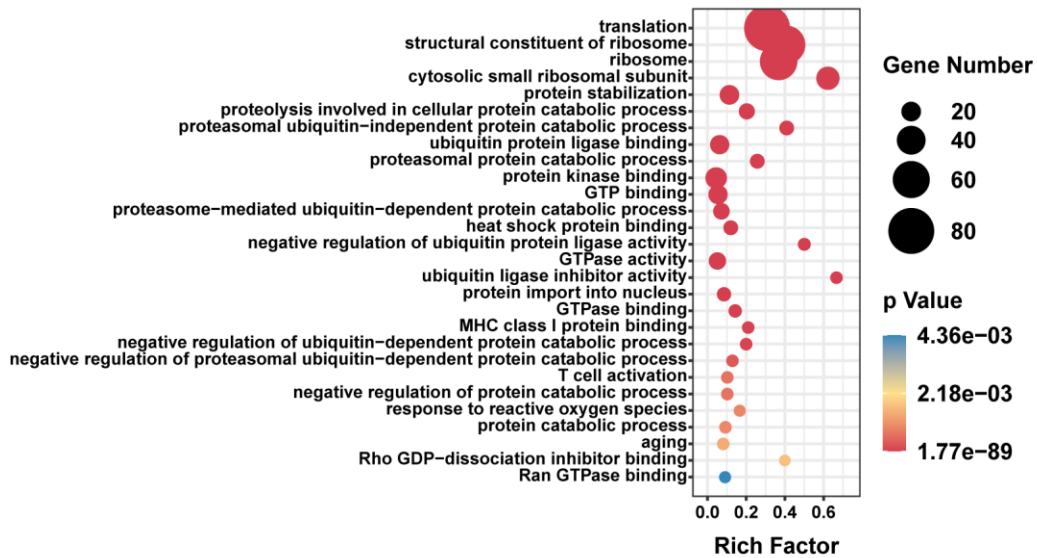

**Fig. S5 GO enrichments of the proteins interact with SELENOW.**

Top 30 pathways associated with proteostasis and GTPase signalling transduction.

**Table S1. DEGs associate with aging and supporting paper sources**

| <b>Gene name</b> | <b>Reference</b> | <b>Gene name</b> | <b>Reference</b> | <b>Gene name</b> | <b>Reference</b> |
|------------------|------------------|------------------|------------------|------------------|------------------|
| CDKN1A           | PMID: 34035185   | PSMB5            | PMID: 30816680   | MDM4             | PMID: 33688918   |
| CSF1R            | PMID: 34867307   | ATF6             | PMID: 29423270   | FBXL20           | PMID: 32898767   |
| DKK3             | PMID: 29717119   | CLU              | PMID: 22795969   | GPR27            | PMID: 33675110   |
| CLK1             | PMID: 16889924   | MGP              | PMID: 12871556   | NTN4             | PMID: 30514230   |
| H19              | PMID: 30107531   | TYROBP           | PMID: 30548312   | ERRC6            | PMID: 16754848   |
| RUNX1            | PMID: 26002684   | CES2C            | PMID: 22446518   | KTA6B            | PMID: 32014431   |
| LCN2             | PMID: 34325073   | CD82             | PMID: 32088828   | EFNB2            | PMID: 26980243   |
| ZKSCAN3          | PMID: 32427330   | TXN1             | PMID: 21873593   | PER3             | PMID: 17309758   |
| SHANK3           | PMID: 36436456   | HMOX1            | PMID: 30009872   | PLA2R1           | PMID: 30216637   |
| COX7A1           | PMID: 18488190   | TBCA             | PMID: 8544776    | CEACAM1          | PMID: 31389127   |
| CCR2             | PMID: 31843499   | FGFBP1           | PMID: 28053031   | CDH23            | PMID: 33179774   |
| LGALS3           | PMID: 30886760   | PYCR1            | PMID: 31091804   | IDH2             | PMID: 29567975   |
| FOS              | PMID: 36840360   | HES1             | PMID: 33561419   | CD38             | PMID: 35687485   |
| SLPR1            | PMID: 32544390   | TRIBP3           | PMID: 33532126   | CNTNAP2          | PMID: 25139204   |
| NOTHC3           | PMID: 31220525   | P2RX4            | PMID: 23303206   | PLAGL2           | PMID: 34916302   |
| CPEB1            | PMID: 36697412   | NFIL3            | PMID: 23209438   | FASN             | PMID: 30962418   |
| RPS28            | PMID: 33974070   | ABCB1A           | PMID: 19429129   |                  |                  |
| MANF             | PMID: 31489403   | CD2AP            | PMID: 31440393   |                  |                  |

Note: PMID is the PubMed reference number.

**Table S2 Name, type, dilution, and source of primary antibodies**

| <b>Antibody</b>                             | <b>Source</b>             | <b>IDENTIFIER</b>               |
|---------------------------------------------|---------------------------|---------------------------------|
| Rabbit monoclonal anti-4EBP1                | HuaBio                    | Cat#ET1701-83                   |
| Rabbit monoclonal anti-Phospho-4EBP1-T45    | HuaBio                    | Cat#RT1004                      |
| Rabbit polyclonal anti-AKT                  | Abclonal                  | Cat#A11016; RRID:AB_2758365     |
| Rabbit monoclonal anti-Phospho-AKT-S473     | Cell signaling technology | Cat#4060; RRID:AB_2315049       |
| Mouse monoclonal anti-Atrogin-1             | Santa Cruz                | Cat#sc-166806; RRID:AB_2246982  |
| Rabbit polyclonal anti-CDC42                | Abclonal                  | Cat#A19028; RRID:AB_2862520     |
| Rabbit polyclonal anti-EIF4G                | HuaBio                    | Cat#ER63337                     |
| Rabbit polyclonal anti-FOXO3                | Abclonal                  | Cat#A0102; RRID:AB_2756951      |
| Rabbit monoclonal anti-Phospho-FOXO3-S253   | HuaBio                    | Cat# ET1609-49, RRID:AB_3069859 |
| Rabbit polyclonal anti-GAPDH                | Abclonal                  | Cat#AC001; RRID:AB_2619673      |
| Rabbit monoclonal anti-mTOR                 | Cell signaling technology | Cat#2983; RRID:AB_2105622       |
| Rabbit polyclonal anti-Phospho-mTOR-S2448   | Abclonal                  | Cat#AP0094; RRID:AB_2771340     |
| Mouse monoclonal anti-MuRF-1                | Santa Cruz                | Cat#sc-398608; RRID:AB_2819249  |
| Mouse monoclonal anti-MyHC                  | Santa Cruz                | Cat#sc-376157; RRID:AB_10989398 |
| Rabbit polyclonal anti-P70S6K               | Abclonal                  | Cat#A2190; RRID:AB_2749844      |
| Mouse monoclonal anti- Phospho -P70S6K-S434 | HuaBio                    | Cat#RT1456;                     |
| Rabbit polyclonal anti-RAC1                 | Proteintech               | Cat#24072-1-AP; RRID:AB_2879427 |
| Rabbit polyclonal anti-SELENOW              | Rockland                  | Cat#600-401-A29S; RRID_2285666  |
| Rabbit polyclonal Laminin B1                | Rabbit                    | Cat# A4373, RRID:AB_2863252     |
| Mouse monoclonal MYH1 (Type I)              | DSHB                      | Cat# BA-D5, RRID:AB_2235587     |
| Mouse monoclonal MYH2 (Type IIA)            | Mouse                     | Cat# SC-71, RRID:AB_2147165     |

Abberavations: 4EBP1, 4ukaryotic translation initiation factor 4E (eIF4E)-binding protein 1; AKT, protein kinase B; Atrogin-1, F-box only protein 32; CDC42, cell division control protein 42; EIF4G, eukaryotic translation initiation factor 4 G; FOXO3, forkhead box O3; GAPDH, glyceraldehyde 3-phosphate dehydrogenase; mTOR, mammalian target of rapamycin; MuRF-1, E3 ubiquitin-protein ligase TRIM63; MyHC, myosin heavy chain; P70S6K, ribosomal protein S6 kinase beta-1; RAC1, Ras-related C3 botulinum toxin substrate 1; SELENOW, selenoproteins W; Type I, myosin heavy chain Type I; Type IIA, myosin heavy chain 2A.



**Table S3 Primer sequences of q-PCR reaction**

| <b>Gene name</b>                                           | <b>Forward primer (5' to 3' direction)</b> | <b>Reverse primer (5' to 3' direction)</b> |
|------------------------------------------------------------|--------------------------------------------|--------------------------------------------|
| <i>Atrogin-1</i>                                           | CAGCTTCGTGAGCGACCTC                        | GGCAGTCGAGAAGTCCAGTC                       |
| <i>MuRF-1</i>                                              | ACCTGCTGGTGGAAAACATC                       | CTTCGTGTTCTTGCACATC                        |
| <i>MyHC</i>                                                | ATAAAGGGGCTGGAGCACTG                       | AGGCAGGAAGAGGAGTAGCA                       |
| <i>RAC-1</i>                                               | CCCAATACTCCTATCATCCTCG                     | CAGCAGGCATTTTCTCTTCC                       |
| <i>SELENOW</i>                                             | AACATGAGTTCCCCGGATGC                       | CCAACCTTCCCGGCTACTGTC                      |
| <b><i>Rho protein signal transduction related gene</i></b> |                                            |                                            |
| <i>ARHGEF40</i>                                            | CACAGGTCCAGAGTGGTTCC                       | GCTCGCCCAGTCTGATCTAC                       |
| <i>EPS8L2</i>                                              | GGCTATCGCAGGAGGGAATC                       | TTCCCCTTTTTCCGCTGGTT                       |
| <i>FGD5</i>                                                | GCCCTCCACTTAACCAGCAT                       | TCATTCTCTGGCACGACCAC                       |
| <i>MCF2L</i>                                               | CAAGGTTTCCGGGAGGTCAA                       | TCCTCAAAGGCGGTCAAGTC                       |
| <i>TIAM1</i>                                               | CAAAACAGGGACAGGACGGT                       | ATTCTCGGACGCTGAAGAGG                       |
| <b><i>Muscle system process related genes</i></b>          |                                            |                                            |
| <i>MYOD</i>                                                | CTGCTCTGATGGCATGATGG                       | GTTCCCTGTTCTGTGTCGCT                       |
| <i>MYOG</i>                                                | TGCCCAGTGAATGCAACTCC                       | TTGGGCATGGTTTCGTCTGG                       |
| <i>CHRNA3</i>                                              | TCCGACTCCAGAATGGCTCT                       | GCCTGCACTAATCCATTGCG                       |
| <i>MYL4</i>                                                | TGCATCAACTATGAAGCCTTTGTC                   | TCCAAGCTGGGGCTCTTTAT                       |
| <i>MYL6B</i>                                               | AGCAACGGCTGCATCAACTA                       | TTGCCTCTCAAGCGGATAACC                      |
| <i>MYOZ2</i>                                               | ACAGATCCCAGGTTCTTGGC                       | CAGATACCCACCCCTTTGGC                       |
| <i>P2RX4</i>                                               | TGTGGCTGTGACCAACTT                         | GCGTCTGAATCGCAAATGCT                       |
| <i>TNNC1</i>                                               | GCTCATGAAGGACGGTGACA                       | CCGTGCAAGACCAGCATCTA                       |
| <b><i>Control protein</i></b>                              |                                            |                                            |
| <i>GAPDH</i>                                               | AGAACATCATCCCTGCATCC                       | GGTCCTCAGTGTAGCCCAAG                       |

Abberavations: ARHGEF40, Rho guanine nucleotide exchange factor 40; CHRNA3, cholinergic receptor nicotinic gamma subunit; GAPDH, glyceraldehyde-3-phosphate dehydrogenase; EPS8L2, EPS8 like 2; FGD5, FYVE, RhoGEF and PH domain containing 5; MCF2L, MCF.2 cell line derived transforming sequence like; TIAM1, MYOD, myogenic differentiation; MYOG, myogenin; MYL4, myosin light chain 4; MYL6B, myosin light chain 6B; MYOZ2, myozenin 2; P2RX4, purinergic receptor P2X 4; TNNC1, troponin C1; TIAM Rac1 associated GEF 1;

**Table S4. Different expression genes in TA muscle between WT and KO aged mice**

Note1: The gene expression level was measured by RPKM (reads per kilo base per million mapped reads).

Values of mRNA levels of differential genes between the two groups are mean, n =3.

Note2: The raw data of RNA-seq reported here are deposited in the Gene Expression Omnibus database under accession no. GSE232366 (If can't access, the private access token: ctofoekqzpwxyz).
